# Supplementary material for: Information Measure for Long-Range Correlated Sequences: the Case of the 24 Human Chromosomes
Source: PubMed Central journal article supplement (PMC3779848; doi:10.1038/srep02721), 2013-09-23
Supplement: srep02721-s1.pdf [file srep02721-s1.pdf]

Information Measure for Long-Range  
Correlated Sequences:  
the case of the 24 Human Chromosomes.  
Supplementary Information

A. Carbone<sup>1,2,3,\*</sup>

August 22, 2013

<sup>1</sup>*Politecnico di Torino, Italy*

<sup>2</sup>*ISC-CNR, Unità Università 'La Sapienza' di Roma, Italy*

<sup>3</sup>*ETH Zurich, Switzerland*

The average values and variance of the nucleotide contents obtained over three disjoint data sets is shown for the 24 chromosomes in Supplementary Tables 1-8. For each set, the parameter  $n$  has been varied in order to generate clusters of any lengths in random position of the sequence. The standard deviations are also reported in the same tables.

Further data, statistics and all the codes can be downloaded at the website [www.polito.it/noiselab](http://www.polito.it/noiselab) in the section *Utilities*.

| CHROMOSOME 1 |       |                |       |                |       |                |       |                |     |       |                | CHROMOSOME 2 |                |       |                |       |                |  |  |  |  |  |  |
|--------------|-------|----------------|-------|----------------|-------|----------------|-------|----------------|-----|-------|----------------|--------------|----------------|-------|----------------|-------|----------------|--|--|--|--|--|--|
| $n$          | A [%] | $\sigma_C$ [A] | C [%] | $\sigma_C$ [C] | G [%] | $\sigma_C$ [G] | T [%] | $\sigma_C$ [T] | $n$ | A [%] | $\sigma_C$ [A] | C [%]        | $\sigma_C$ [C] | G [%] | $\sigma_C$ [G] | T [%] | $\sigma_C$ [T] |  |  |  |  |  |  |
| 2            | 27.31 | 10.11          | 25.24 | 11.34          | 24.81 | 9.95           | 25.58 | 8.29           | 2   | 29.87 | 12.57          | 24.86        | 11.62          | 23.01 | 11.45          | 32.68 | 12.56          |  |  |  |  |  |  |
| 4            | 26.52 | 11.01          | 25.79 | 10.81          | 25.58 | 10.06          | 25.15 | 9.68           | 4   | 28.50 | 14.19          | 24.51        | 12.90          | 22.34 | 12.43          | 29.81 | 14.30          |  |  |  |  |  |  |
| 6            | 24.31 | 9.62           | 26.05 | 10.93          | 25.61 | 9.83           | 24.72 | 9.53           | 6   | 26.46 | 13.42          | 24.43        | 12.80          | 22.25 | 12.77          | 29.01 | 13.16          |  |  |  |  |  |  |
| 8            | 24.68 | 10.11          | 25.95 | 11.33          | 26.17 | 10.65          | 23.59 | 9.55           | 8   | 27.23 | 12.09          | 23.01        | 11.74          | 22.22 | 12.09          | 28.13 | 12.36          |  |  |  |  |  |  |
| 10           | 24.48 | 8.96           | 25.89 | 10.46          | 26.18 | 10.27          | 23.77 | 8.78           | 10  | 26.10 | 10.89          | 23.63        | 11.12          | 22.55 | 10.94          | 28.25 | 11.01          |  |  |  |  |  |  |
| 2            | 25.94 | 4.95           | 23.64 | 4.50           | 24.24 | 5.45           | 26.18 | 5.79           | 2   | 27.81 | 5.29           | 21.76        | 4.57           | 23.40 | 5.81           | 27.02 | 6.36           |  |  |  |  |  |  |
| 4            | 25.47 | 6.02           | 24.08 | 5.25           | 24.21 | 5.99           | 26.56 | 7.04           | 4   | 27.57 | 5.45           | 21.76        | 5.12           | 23.07 | 5.65           | 27.59 | 7.19           |  |  |  |  |  |  |
| 6            | 25.92 | 5.66           | 23.78 | 5.12           | 24.49 | 6.17           | 25.95 | 6.25           | 6   | 28.08 | 5.84           | 21.86        | 4.92           | 22.94 | 5.47           | 27.10 | 6.30           |  |  |  |  |  |  |
| 8            | 25.88 | 5.38           | 23.80 | 4.89           | 24.51 | 5.41           | 25.81 | 5.39           | 8   | 28.04 | 5.38           | 21.84        | 4.70           | 23.04 | 5.80           | 27.06 | 5.84           |  |  |  |  |  |  |
| 10           | 25.82 | 5.22           | 24.04 | 4.81           | 24.66 | 5.39           | 25.48 | 5.33           | 10  | 27.94 | 5.29           | 22.03        | 4.80           | 22.80 | 4.79           | 27.21 | 5.27           |  |  |  |  |  |  |
| 2            | 26.62 | 6.09           | 23.00 | 5.32           | 25.04 | 6.18           | 25.84 | 5.82           | 2   | 30.50 | 4.45           | 20.14        | 4.42           | 20.16 | 4.12           | 29.19 | 4.72           |  |  |  |  |  |  |
| 4            | 26.33 | 6.14           | 23.26 | 4.75           | 24.85 | 5.66           | 25.69 | 6.10           | 4   | 30.52 | 4.97           | 19.94        | 4.07           | 19.63 | 3.92           | 29.92 | 5.23           |  |  |  |  |  |  |
| 6            | 26.07 | 5.41           | 23.67 | 4.94           | 24.67 | 5.27           | 25.58 | 5.33           | 6   | 30.29 | 4.82           | 19.84        | 3.99           | 19.68 | 3.74           | 30.18 | 4.87           |  |  |  |  |  |  |
| 8            | 25.84 | 5.64           | 24.44 | 5.67           | 24.64 | 5.45           | 25.34 | 5.26           | 8   | 30.50 | 3.82           | 19.88        | 3.81           | 19.54 | 3.21           | 30.08 | 4.28           |  |  |  |  |  |  |
| 10           | 25.90 | 5.01           | 23.91 | 4.85           | 25.09 | 4.99           | 25.10 | 4.71           | 10  | 30.31 | 3.94           | 19.77        | 3.58           | 19.42 | 3.60           | 30.49 | 4.44           |  |  |  |  |  |  |

  

| CHROMOSOME 3 |       |                |       |                |       |                |       |                |     |       |                | CHROMOSOME 4 |                |       |                |       |                |  |  |  |  |  |  |
|--------------|-------|----------------|-------|----------------|-------|----------------|-------|----------------|-----|-------|----------------|--------------|----------------|-------|----------------|-------|----------------|--|--|--|--|--|--|
| $n$          | A [%] | $\sigma_C$ [A] | C [%] | $\sigma_C$ [C] | G [%] | $\sigma_C$ [G] | T [%] | $\sigma_C$ [T] | $n$ | A [%] | $\sigma_C$ [A] | C [%]        | $\sigma_C$ [C] | G [%] | $\sigma_C$ [G] | T [%] | $\sigma_C$ [T] |  |  |  |  |  |  |
| 2            | 29.32 | 10.13          | 22.17 | 9.85           | 22.44 | 8.30           | 28.32 | 8.32           | 2   | 39.10 | 15.15          | 22.24        | 13.55          | 24.20 | 13.21          | 35.90 | 15.69          |  |  |  |  |  |  |
| 4            | 28.46 | 10.05          | 21.77 | 9.43           | 21.50 | 8.29           | 28.65 | 8.52           | 4   | 34.47 | 16.56          | 19.80        | 12.91          | 22.86 | 13.87          | 30.28 | 17.79          |  |  |  |  |  |  |
| 6            | 28.72 | 9.70           | 21.61 | 8.85           | 21.93 | 8.38           | 28.08 | 8.51           | 6   | 31.74 | 17.41          | 19.41        | 12.92          | 21.92 | 13.76          | 29.21 | 18.12          |  |  |  |  |  |  |
| 8            | 28.59 | 9.27           | 21.35 | 8.42           | 22.15 | 8.37           | 28.08 | 8.55           | 8   | 31.59 | 16.35          | 18.64        | 11.49          | 21.69 | 13.52          | 29.15 | 17.90          |  |  |  |  |  |  |
| 10           | 28.49 | 9.01           | 22.00 | 8.91           | 22.17 | 8.45           | 27.62 | 8.06           | 10  | 30.98 | 15.47          | 18.92        | 11.16          | 20.91 | 12.18          | 29.28 | 15.90          |  |  |  |  |  |  |
| 2            | 28.68 | 6.90           | 20.84 | 4.68           | 23.39 | 7.00           | 27.46 | 8.54           | 2   | 30.13 | 9.37           | 19.75        | 6.39           | 19.27 | 7.70           | 30.85 | 9.89           |  |  |  |  |  |  |
| 4            | 28.43 | 5.62           | 21.10 | 4.64           | 23.13 | 5.90           | 27.73 | 6.59           | 4   | 31.20 | 8.37           | 18.93        | 5.45           | 18.72 | 6.98           | 31.30 | 9.67           |  |  |  |  |  |  |
| 6            | 27.76 | 6.23           | 21.54 | 4.73           | 22.86 | 5.96           | 28.03 | 6.77           | 6   | 31.30 | 8.21           | 18.94        | 6.12           | 18.28 | 5.78           | 31.48 | 8.66           |  |  |  |  |  |  |
| 8            | 27.07 | 5.20           | 22.35 | 4.58           | 22.64 | 5.18           | 27.95 | 6.45           | 8   | 31.20 | 8.13           | 18.89        | 5.41           | 17.94 | 6.19           | 31.96 | 9.04           |  |  |  |  |  |  |
| 10           | 27.39 | 5.14           | 22.46 | 5.20           | 23.03 | 5.02           | 27.12 | 5.56           | 10  | 31.10 | 8.14           | 18.81        | 5.00           | 18.12 | 5.84           | 31.97 | 9.13           |  |  |  |  |  |  |
| 2            | 30.73 | 6.31           | 19.21 | 4.50           | 19.99 | 4.27           | 30.37 | 5.37           | 2   | 31.09 | 5.36           | 19.86        | 5.24           | 20.44 | 6.64           | 29.08 | 6.77           |  |  |  |  |  |  |
| 4            | 31.25 | 5.96           | 18.87 | 4.17           | 19.48 | 3.64           | 30.65 | 4.90           | 4   | 30.77 | 5.61           | 19.27        | 4.96           | 20.04 | 5.88           | 29.93 | 6.42           |  |  |  |  |  |  |
| 6            | 30.67 | 4.88           | 19.29 | 4.02           | 19.57 | 4.32           | 30.47 | 5.21           | 6   | 31.17 | 5.90           | 19.24        | 4.72           | 20.10 | 5.11           | 29.49 | 6.37           |  |  |  |  |  |  |
| 8            | 30.84 | 4.35           | 19.04 | 3.27           | 19.56 | 3.98           | 30.56 | 5.85           | 8   | 31.42 | 5.57           | 19.08        | 4.11           | 20.04 | 5.22           | 29.46 | 5.89           |  |  |  |  |  |  |
| 10           | 30.12 | 5.09           | 19.46 | 3.70           | 19.94 | 4.20           | 30.49 | 5.11           | 10  | 31.25 | 5.16           | 19.21        | 4.25           | 20.01 | 4.82           | 29.53 | 5.89           |  |  |  |  |  |  |

Table 1: Average Nucleotide Composition of the Clusters. Base composition and standard deviation of nucleotide % of A ( $3^{rd}$  and  $4^{th}$  columns), % of C ( $5^{th}$  and  $6^{th}$  columns), % of G ( $7^{th}$  and  $8^{th}$  columns), % of T ( $9^{th}$  and  $10^{th}$  columns). Different  $k$ 's refer to the first ( $M_1$ ), second ( $M_2$ ) and third ( $M_3$ ) disjoint sets of the chromosomes 1, 2, 3, 4. Different values of  $n$  are shown also.

| CHROMOSOME 5 |       |                |       |                |       |                |       |                |     |       |                |       |                | CHROMOSOME 6 |                |       |                |  |  |  |  |  |  |  |  |  |  |
|--------------|-------|----------------|-------|----------------|-------|----------------|-------|----------------|-----|-------|----------------|-------|----------------|--------------|----------------|-------|----------------|--|--|--|--|--|--|--|--|--|--|
| $n$          | A [%] | $\sigma_C$ [A] | C [%] | $\sigma_C$ [C] | G [%] | $\sigma_C$ [G] | T [%] | $\sigma_C$ [T] | $n$ | A [%] | $\sigma_C$ [A] | C [%] | $\sigma_C$ [C] | G [%]        | $\sigma_C$ [G] | T [%] | $\sigma_C$ [T] |  |  |  |  |  |  |  |  |  |  |
| 2            | 38.67 | 16.10          | 26.08 | 13.44          | 20.28 | 11.83          | 42.62 | 13.40          | 2   | 30.20 | 9.93           | 21.79 | 7.09           | 21.10        | 6.63           | 28.49 | 8.97           |  |  |  |  |  |  |  |  |  |  |
| 4            | 29.97 | 19.75          | 24.86 | 14.32          | 19.70 | 12.76          | 36.43 | 16.69          | 4   | 29.97 | 9.07           | 21.23 | 6.33           | 21.73        | 7.42           | 28.27 | 8.71           |  |  |  |  |  |  |  |  |  |  |
| 6            | 27.90 | 19.23          | 24.21 | 13.69          | 19.11 | 11.78          | 33.24 | 17.76          | 6   | 29.00 | 8.84           | 22.04 | 7.86           | 21.67        | 7.58           | 27.75 | 8.37           |  |  |  |  |  |  |  |  |  |  |
| 8            | 26.77 | 16.82          | 24.07 | 12.89          | 18.83 | 11.45          | 32.46 | 16.22          | 8   | 28.69 | 8.83           | 22.15 | 8.10           | 21.44        | 6.50           | 28.30 | 8.17           |  |  |  |  |  |  |  |  |  |  |
| 10           | 26.72 | 16.00          | 23.66 | 12.64          | 19.19 | 11.29          | 31.19 | 15.47          | 10  | 28.35 | 7.90           | 22.54 | 7.63           | 21.03        | 7.12           | 28.33 | 7.60           |  |  |  |  |  |  |  |  |  |  |
| 2            | 34.90 | 16.10          | 21.89 | 13.00          | 23.40 | 10.37          | 33.17 | 15.08          | 2   | 28.77 | 5.30           | 21.47 | 4.72           | 21.11        | 3.97           | 28.65 | 5.46           |  |  |  |  |  |  |  |  |  |  |
| 4            | 32.36 | 16.35          | 21.60 | 12.87          | 23.98 | 12.58          | 30.32 | 16.83          | 4   | 28.59 | 5.14           | 21.33 | 4.26           | 21.46        | 3.85           | 28.62 | 5.13           |  |  |  |  |  |  |  |  |  |  |
| 6            | 28.81 | 15.12          | 22.37 | 12.87          | 21.98 | 11.66          | 29.16 | 16.07          | 6   | 28.45 | 5.77           | 21.66 | 5.25           | 21.47        | 4.44           | 28.38 | 5.03           |  |  |  |  |  |  |  |  |  |  |
| 8            | 29.67 | 14.59          | 21.70 | 12.20          | 22.39 | 11.59          | 27.21 | 14.74          | 8   | 28.48 | 5.60           | 21.36 | 5.65           | 21.43        | 3.79           | 28.67 | 5.06           |  |  |  |  |  |  |  |  |  |  |
| 10           | 29.18 | 12.77          | 21.27 | 10.16          | 21.99 | 9.79           | 28.06 | 13.01          | 10  | 28.64 | 5.11           | 21.20 | 3.88           | 21.21        | 3.64           | 28.85 | 4.77           |  |  |  |  |  |  |  |  |  |  |
| 2            | 30.18 | 10.32          | 19.67 | 8.34           | 23.38 | 9.83           | 28.88 | 12.60          | 2   | 30.73 | 5.02           | 19.02 | 4.47           | 19.94        | 4.74           | 30.31 | 6.04           |  |  |  |  |  |  |  |  |  |  |
| 4            | 30.94 | 11.06          | 18.89 | 7.70           | 23.18 | 10.12          | 28.08 | 12.35          | 4   | 30.67 | 4.97           | 19.47 | 4.60           | 19.99        | 4.22           | 29.87 | 6.10           |  |  |  |  |  |  |  |  |  |  |
| 6            | 30.71 | 10.08          | 19.16 | 7.18           | 22.21 | 9.14           | 28.06 | 11.45          | 6   | 30.33 | 4.60           | 19.85 | 4.31           | 20.26        | 3.60           | 29.55 | 5.22           |  |  |  |  |  |  |  |  |  |  |
| 8            | 30.69 | 9.52           | 18.75 | 6.80           | 21.84 | 9.15           | 28.89 | 11.13          | 8   | 30.39 | 4.59           | 19.59 | 4.03           | 20.05        | 3.67           | 29.97 | 4.97           |  |  |  |  |  |  |  |  |  |  |
| 10           | 30.44 | 9.13           | 18.89 | 6.49           | 21.70 | 8.72           | 29.13 | 10.66          | 10  | 30.50 | 4.64           | 19.64 | 3.84           | 20.13        | 4.30           | 29.73 | 5.36           |  |  |  |  |  |  |  |  |  |  |

  

| CHROMOSOME 7 |       |                |       |                |       |                |       |                |     |       |                |       |                | CHROMOSOME 8 |                |       |                |  |  |  |  |  |  |  |  |  |  |
|--------------|-------|----------------|-------|----------------|-------|----------------|-------|----------------|-----|-------|----------------|-------|----------------|--------------|----------------|-------|----------------|--|--|--|--|--|--|--|--|--|--|
| $n$          | A [%] | $\sigma_C$ [A] | C [%] | $\sigma_C$ [C] | G [%] | $\sigma_C$ [G] | T [%] | $\sigma_C$ [T] | $n$ | A [%] | $\sigma_C$ [A] | C [%] | $\sigma_C$ [C] | G [%]        | $\sigma_C$ [G] | T [%] | $\sigma_C$ [T] |  |  |  |  |  |  |  |  |  |  |
| 2            | 29.06 | 8.12           | 21.65 | 8.09           | 26.51 | 10.55          | 23.22 | 9.51           | 2   | 29.46 | 4.78           | 20.44 | 4.08           | 21.30        | 4.23           | 28.79 | 4.65           |  |  |  |  |  |  |  |  |  |  |
| 4            | 28.85 | 8.58           | 21.79 | 8.32           | 27.09 | 11.14          | 22.93 | 10.21          | 4   | 29.51 | 4.89           | 20.61 | 3.88           | 20.85        | 4.33           | 29.03 | 4.91           |  |  |  |  |  |  |  |  |  |  |
| 6            | 27.51 | 8.34           | 22.31 | 8.85           | 26.65 | 10.31          | 23.65 | 9.47           | 6   | 29.18 | 4.85           | 20.85 | 3.88           | 21.23        | 4.10           | 28.74 | 4.45           |  |  |  |  |  |  |  |  |  |  |
| 8            | 26.88 | 8.22           | 23.33 | 10.23          | 25.85 | 10.49          | 24.07 | 8.90           | 8   | 28.74 | 5.21           | 21.17 | 4.22           | 21.94        | 4.97           | 28.15 | 4.72           |  |  |  |  |  |  |  |  |  |  |
| 10           | 26.38 | 7.91           | 23.97 | 9.78           | 25.28 | 9.83           | 24.59 | 8.17           | 10  | 28.46 | 4.67           | 20.91 | 3.88           | 22.21        | 4.88           | 28.43 | 4.45           |  |  |  |  |  |  |  |  |  |  |
| 2            | 32.16 | 8.29           | 19.75 | 6.25           | 19.37 | 7.27           | 29.04 | 8.29           | 2   | 30.33 | 5.23           | 20.37 | 5.01           | 21.02        | 4.78           | 28.28 | 5.36           |  |  |  |  |  |  |  |  |  |  |
| 4            | 31.99 | 6.91           | 18.97 | 4.99           | 19.38 | 6.41           | 29.94 | 7.62           | 4   | 30.44 | 4.66           | 20.30 | 4.35           | 20.65        | 5.24           | 28.61 | 4.99           |  |  |  |  |  |  |  |  |  |  |
| 6            | 31.87 | 6.03           | 18.93 | 4.83           | 18.84 | 5.51           | 30.49 | 6.76           | 6   | 30.28 | 4.74           | 20.53 | 4.66           | 20.44        | 4.32           | 28.75 | 4.90           |  |  |  |  |  |  |  |  |  |  |
| 8            | 31.43 | 5.29           | 18.76 | 4.20           | 18.65 | 5.27           | 31.28 | 6.69           | 8   | 30.43 | 4.68           | 20.29 | 4.38           | 20.40        | 4.41           | 28.88 | 5.23           |  |  |  |  |  |  |  |  |  |  |
| 10           | 31.40 | 5.45           | 18.70 | 4.13           | 18.59 | 4.47           | 31.31 | 6.11           | 10  | 30.15 | 4.88           | 20.36 | 4.63           | 20.52        | 4.80           | 28.97 | 4.51           |  |  |  |  |  |  |  |  |  |  |
| 2            | 30.60 | 6.82           | 20.99 | 4.29           | 19.99 | 4.94           | 28.43 | 6.46           | 2   | 27.97 | 6.08           | 22.15 | 4.99           | 21.72        | 4.42           | 28.16 | 6.32           |  |  |  |  |  |  |  |  |  |  |
| 4            | 29.28 | 7.22           | 21.43 | 4.72           | 20.28 | 5.10           | 29.01 | 7.62           | 4   | 27.87 | 5.33           | 22.38 | 5.20           | 21.63        | 4.41           | 28.12 | 5.59           |  |  |  |  |  |  |  |  |  |  |
| 6            | 29.19 | 5.73           | 21.07 | 4.05           | 20.73 | 4.90           | 29.01 | 6.28           | 6   | 28.00 | 4.78           | 21.75 | 4.48           | 22.08        | 4.14           | 28.18 | 5.45           |  |  |  |  |  |  |  |  |  |  |
| 8            | 29.57 | 5.63           | 20.86 | 3.96           | 20.67 | 4.94           | 28.91 | 6.07           | 8   | 28.27 | 4.71           | 21.95 | 4.26           | 21.73        | 4.21           | 28.06 | 5.15           |  |  |  |  |  |  |  |  |  |  |
| 10           | 29.48 | 5.45           | 20.67 | 3.97           | 20.70 | 4.45           | 29.15 | 5.68           | 10  | 27.69 | 4.63           | 22.01 | 4.31           | 22.13        | 4.04           | 28.17 | 4.90           |  |  |  |  |  |  |  |  |  |  |

Table 2: Same as Table 1 but for the chromosomes 5, 6, 7, 8.

| CHROMOSOME 9 |       |                |       |                |       |                |       |                |     |       |                |       | CHROMOSOME 10  |       |                |       |                |  |  |  |  |  |  |  |  |
|--------------|-------|----------------|-------|----------------|-------|----------------|-------|----------------|-----|-------|----------------|-------|----------------|-------|----------------|-------|----------------|--|--|--|--|--|--|--|--|
| $n$          | A [%] | $\sigma_C$ [A] | C [%] | $\sigma_C$ [C] | G [%] | $\sigma_C$ [G] | T [%] | $\sigma_C$ [T] | $n$ | A [%] | $\sigma_C$ [A] | C [%] | $\sigma_C$ [C] | G [%] | $\sigma_C$ [G] | T [%] | $\sigma_C$ [T] |  |  |  |  |  |  |  |  |
| 2            | 28.47 | 5.05           | 21.72 | 4.61           | 20.93 | 4.92           | 28.87 | 5.52           | 2   | 31.61 | 9.77           | 19.73 | 8.05           | 19.88 | 7.08           | 29.08 | 8.92           |  |  |  |  |  |  |  |  |
| 4            | 27.91 | 6.49           | 21.83 | 4.97           | 21.38 | 4.36           | 28.76 | 5.23           | 4   | 31.15 | 10.84          | 19.94 | 9.04           | 19.47 | 7.52           | 29.44 | 9.38           |  |  |  |  |  |  |  |  |
| 6            | 27.84 | 6.07           | 22.07 | 6.37           | 21.94 | 5.03           | 28.21 | 5.71           | 6   | 31.59 | 9.73           | 20.05 | 7.63           | 19.56 | 8.08           | 29.46 | 10.13          |  |  |  |  |  |  |  |  |
| 8            | 27.99 | 6.19           | 22.19 | 7.00           | 21.46 | 5.65           | 28.29 | 5.17           | 8   | 30.85 | 10.08          | 20.34 | 8.58           | 18.82 | 7.72           | 30.12 | 9.73           |  |  |  |  |  |  |  |  |
| 10           | 27.96 | 5.03           | 22.05 | 6.37           | 21.89 | 5.59           | 28.04 | 4.92           | 10  | 31.08 | 9.55           | 20.40 | 8.43           | 18.10 | 7.38           | 30.53 | 8.92           |  |  |  |  |  |  |  |  |
| 2            | 29.60 | 5.12           | 20.23 | 4.27           | 20.20 | 4.67           | 29.98 | 6.23           | 2   | 29.87 | 11.56          | 19.91 | 7.52           | 24.02 | 8.49           | 27.02 | 11.13          |  |  |  |  |  |  |  |  |
| 4            | 29.36 | 6.14           | 20.75 | 4.63           | 19.51 | 4.61           | 30.38 | 6.14           | 4   | 30.28 | 11.01          | 19.59 | 7.60           | 22.90 | 8.37           | 27.98 | 10.54          |  |  |  |  |  |  |  |  |
| 6            | 29.55 | 4.68           | 20.19 | 3.94           | 19.80 | 4.24           | 30.45 | 5.58           | 6   | 30.38 | 10.44          | 19.42 | 7.48           | 21.99 | 8.48           | 29.04 | 10.80          |  |  |  |  |  |  |  |  |
| 8            | 29.68 | 4.73           | 20.13 | 3.81           | 19.73 | 3.69           | 30.46 | 4.79           | 8   | 30.99 | 9.40           | 19.22 | 6.53           | 21.17 | 7.71           | 28.98 | 9.39           |  |  |  |  |  |  |  |  |
| 10           | 29.47 | 4.48           | 20.34 | 3.77           | 19.74 | 3.16           | 30.45 | 4.72           | 10  | 30.63 | 8.43           | 19.68 | 5.99           | 21.00 | 7.43           | 28.87 | 8.91           |  |  |  |  |  |  |  |  |
| 2            | 30.03 | 5.76           | 20.57 | 4.51           | 21.83 | 5.19           | 27.78 | 4.77           | 2   | 27.22 | 9.61           | 21.98 | 7.65           | 24.82 | 9.16           | 26.85 | 11.75          |  |  |  |  |  |  |  |  |
| 4            | 29.85 | 5.06           | 20.59 | 3.97           | 21.60 | 4.51           | 27.96 | 4.98           | 4   | 27.53 | 9.86           | 21.86 | 7.66           | 24.90 | 9.57           | 25.90 | 11.44          |  |  |  |  |  |  |  |  |
| 6            | 29.56 | 4.86           | 20.83 | 3.98           | 21.58 | 4.42           | 28.03 | 4.81           | 6   | 28.31 | 9.00           | 21.34 | 7.05           | 24.67 | 8.44           | 25.85 | 9.76           |  |  |  |  |  |  |  |  |
| 8            | 29.31 | 4.58           | 20.97 | 3.82           | 21.50 | 3.80           | 28.23 | 4.47           | 8   | 28.18 | 8.98           | 22.08 | 7.09           | 23.66 | 7.41           | 26.24 | 9.08           |  |  |  |  |  |  |  |  |
| 10           | 29.14 | 4.69           | 21.10 | 3.72           | 21.55 | 3.58           | 28.22 | 4.00           | 10  | 27.46 | 8.53           | 22.20 | 6.99           | 23.74 | 8.08           | 26.59 | 9.50           |  |  |  |  |  |  |  |  |

  

| CHROMOSOME 11 |       |                |       |                |       |                |       |                |     |       |                |       | CHROMOSOME 12  |       |                |       |                |  |  |  |  |  |  |  |  |
|---------------|-------|----------------|-------|----------------|-------|----------------|-------|----------------|-----|-------|----------------|-------|----------------|-------|----------------|-------|----------------|--|--|--|--|--|--|--|--|
| $n$           | A [%] | $\sigma_C$ [A] | C [%] | $\sigma_C$ [C] | G [%] | $\sigma_C$ [G] | T [%] | $\sigma_C$ [T] | $n$ | A [%] | $\sigma_C$ [A] | C [%] | $\sigma_C$ [C] | G [%] | $\sigma_C$ [G] | T [%] | $\sigma_C$ [T] |  |  |  |  |  |  |  |  |
| 2             | 29.26 | 9.87           | 21.99 | 7.82           | 24.40 | 11.32          | 27.47 | 10.11          | 2   | 34.76 | 14.95          | 24.49 | 13.32          | 25.09 | 13.05          | 34.26 | 13.25          |  |  |  |  |  |  |  |  |
| 4             | 28.97 | 9.12           | 22.23 | 8.83           | 25.08 | 11.69          | 26.85 | 10.87          | 4   | 30.66 | 17.09          | 22.85 | 14.86          | 24.19 | 14.13          | 29.62 | 15.63          |  |  |  |  |  |  |  |  |
| 6             | 26.63 | 8.87           | 23.26 | 9.46           | 24.78 | 12.88          | 26.66 | 11.31          | 6   | 30.02 | 16.87          | 21.91 | 14.19          | 24.09 | 14.12          | 27.59 | 15.58          |  |  |  |  |  |  |  |  |
| 8             | 26.28 | 9.23           | 23.93 | 10.76          | 23.93 | 11.97          | 26.28 | 10.33          | 8   | 27.79 | 14.28          | 23.12 | 12.79          | 22.88 | 13.10          | 27.62 | 14.11          |  |  |  |  |  |  |  |  |
| 10            | 25.65 | 9.03           | 23.52 | 10.98          | 24.83 | 13.14          | 26.23 | 10.48          | 10  | 26.73 | 13.38          | 23.06 | 12.73          | 23.35 | 13.05          | 27.37 | 13.31          |  |  |  |  |  |  |  |  |
| 2             | 27.26 | 11.01          | 21.67 | 7.27           | 21.50 | 8.77           | 30.41 | 13.20          | 2   | 28.06 | 10.73          | 20.87 | 7.88           | 21.15 | 9.12           | 30.17 | 11.40          |  |  |  |  |  |  |  |  |
| 4             | 27.02 | 10.15          | 21.86 | 8.03           | 20.83 | 8.05           | 30.48 | 11.75          | 4   | 28.45 | 10.97          | 20.27 | 7.68           | 20.31 | 9.67           | 30.97 | 11.56          |  |  |  |  |  |  |  |  |
| 6             | 27.48 | 10.23          | 21.61 | 7.74           | 20.90 | 8.36           | 30.18 | 11.51          | 6   | 28.98 | 10.18          | 20.31 | 7.16           | 19.92 | 7.94           | 31.13 | 10.87          |  |  |  |  |  |  |  |  |
| 8             | 27.58 | 9.68           | 21.78 | 7.39           | 21.12 | 8.18           | 29.52 | 11.08          | 8   | 29.41 | 9.46           | 20.19 | 6.58           | 19.80 | 7.58           | 30.61 | 10.08          |  |  |  |  |  |  |  |  |
| 10            | 27.60 | 9.69           | 21.96 | 7.93           | 21.01 | 7.43           | 29.71 | 10.35          | 10  | 29.06 | 9.23           | 20.36 | 6.67           | 19.83 | 7.71           | 30.75 | 9.65           |  |  |  |  |  |  |  |  |
| 2             | 30.18 | 11.93          | 20.84 | 11.12          | 21.56 | 10.35          | 29.10 | 11.36          | 2   | 29.75 | 11.94          | 20.78 | 8.79           | 21.48 | 9.97           | 29.38 | 13.11          |  |  |  |  |  |  |  |  |
| 4             | 30.14 | 11.36          | 20.66 | 10.53          | 20.14 | 9.56           | 29.49 | 11.32          | 4   | 29.85 | 10.84          | 20.83 | 8.62           | 20.24 | 8.97           | 30.15 | 12.35          |  |  |  |  |  |  |  |  |
| 6             | 30.55 | 10.57          | 20.02 | 9.98           | 20.14 | 9.46           | 29.60 | 11.05          | 6   | 29.53 | 10.20          | 20.62 | 8.75           | 19.72 | 8.66           | 30.59 | 11.18          |  |  |  |  |  |  |  |  |
| 8             | 29.78 | 10.89          | 20.87 | 10.23          | 19.24 | 9.04           | 30.23 | 10.77          | 8   | 30.83 | 9.56           | 20.07 | 7.30           | 19.40 | 8.59           | 29.88 | 10.96          |  |  |  |  |  |  |  |  |
| 10            | 30.02 | 9.48           | 20.36 | 8.70           | 19.30 | 8.14           | 30.32 | 9.51           | 10  | 30.30 | 9.38           | 20.05 | 7.03           | 19.33 | 8.09           | 30.33 | 10.43          |  |  |  |  |  |  |  |  |

Table 3: Same as Table 1 but for the chromosomes 9, 10, 11, 12.

| CHROMOSOME 13 |     |       |                |       |                |       |                |       |                |  |     |       |                | CHROMOSOME 14 |                |       |                |       |                |  |  |  |  |  |  |  |  |
|---------------|-----|-------|----------------|-------|----------------|-------|----------------|-------|----------------|--|-----|-------|----------------|---------------|----------------|-------|----------------|-------|----------------|--|--|--|--|--|--|--|--|
|               | $n$ | A [%] | $\sigma_C$ [A] | C [%] | $\sigma_C$ [C] | G [%] | $\sigma_C$ [G] | T [%] | $\sigma_C$ [T] |  | $n$ | A [%] | $\sigma_C$ [A] | C [%]         | $\sigma_C$ [C] | G [%] | $\sigma_C$ [G] | T [%] | $\sigma_C$ [T] |  |  |  |  |  |  |  |  |
|               | 2   | 40.65 | 14.23          | 22.09 | 12.40          | 23.04 | 13.69          | 41.30 | 14.70          |  | 2   | 41.94 | 15.83          | 20.20         | 11.03          | 23.04 | 13.01          | 40.63 | 17.09          |  |  |  |  |  |  |  |  |
| $k = 1$       | 4   | 33.94 | 17.12          | 20.95 | 12.01          | 21.82 | 13.78          | 33.88 | 18.11          |  | 4   | 35.84 | 19.53          | 20.02         | 13.06          | 21.92 | 13.43          | 30.95 | 19.26          |  |  |  |  |  |  |  |  |
|               | 6   | 30.35 | 16.75          | 20.83 | 12.45          | 21.90 | 12.49          | 30.88 | 17.42          |  | 6   | 34.11 | 17.06          | 18.23         | 11.65          | 23.30 | 12.87          | 27.56 | 18.13          |  |  |  |  |  |  |  |  |
|               | 8   | 29.31 | 15.73          | 21.22 | 11.54          | 21.18 | 12.66          | 30.10 | 16.99          |  | 8   | 32.72 | 17.23          | 18.49         | 11.55          | 23.28 | 12.98          | 27.16 | 17.71          |  |  |  |  |  |  |  |  |
|               | 10  | 29.54 | 14.63          | 21.12 | 11.21          | 21.56 | 11.51          | 29.00 | 15.72          |  | 10  | 31.44 | 15.34          | 19.18         | 11.52          | 22.63 | 12.56          | 27.63 | 15.97          |  |  |  |  |  |  |  |  |
|               | 2   | 42.73 | 17.08          | 21.84 | 11.77          | 22.74 | 13.27          | 43.58 | 15.19          |  | 2   | 40.24 | 16.10          | 23.25         | 14.31          | 21.61 | 13.92          | 40.57 | 12.29          |  |  |  |  |  |  |  |  |
| $k = 2$       | 4   | 35.36 | 19.85          | 20.15 | 13.49          | 20.58 | 12.48          | 35.63 | 17.46          |  | 4   | 33.37 | 18.24          | 21.03         | 13.95          | 20.33 | 14.74          | 34.19 | 18.21          |  |  |  |  |  |  |  |  |
|               | 6   | 35.00 | 20.06          | 18.97 | 11.70          | 21.21 | 12.20          | 30.10 | 19.56          |  | 6   | 30.48 | 19.31          | 21.66         | 15.06          | 19.76 | 14.53          | 31.55 | 18.48          |  |  |  |  |  |  |  |  |
|               | 8   | 32.55 | 17.25          | 18.68 | 10.58          | 21.90 | 11.83          | 28.91 | 16.84          |  | 8   | 29.30 | 16.72          | 21.21         | 12.93          | 19.25 | 12.89          | 31.43 | 16.17          |  |  |  |  |  |  |  |  |
|               | 10  | 31.63 | 17.27          | 19.06 | 10.87          | 21.78 | 10.49          | 28.56 | 16.23          |  | 10  | 29.92 | 15.80          | 20.79         | 11.81          | 19.14 | 11.12          | 30.63 | 14.70          |  |  |  |  |  |  |  |  |
|               | 2   | 41.87 | 14.57          | 20.52 | 12.37          | 25.57 | 14.60          | 37.41 | 13.91          |  | 2   | 41.55 | 15.36          | 22.11         | 14.66          | 23.34 | 12.15          | 37.42 | 12.47          |  |  |  |  |  |  |  |  |
| $k = 3$       | 4   | 34.21 | 17.35          | 19.82 | 14.46          | 24.50 | 15.43          | 28.82 | 18.55          |  | 4   | 36.90 | 18.39          | 20.44         | 15.14          | 22.74 | 13.00          | 32.29 | 17.48          |  |  |  |  |  |  |  |  |
|               | 6   | 32.78 | 16.31          | 19.16 | 13.24          | 24.29 | 13.45          | 27.20 | 16.99          |  | 6   | 33.79 | 17.42          | 19.15         | 13.34          | 22.07 | 12.46          | 30.30 | 15.69          |  |  |  |  |  |  |  |  |
|               | 8   | 32.22 | 15.61          | 19.01 | 12.64          | 24.26 | 13.08          | 26.31 | 16.03          |  | 8   | 33.86 | 16.52          | 18.09         | 12.17          | 20.97 | 11.97          | 28.82 | 15.26          |  |  |  |  |  |  |  |  |
|               | 10  | 30.65 | 14.53          | 19.87 | 11.66          | 22.75 | 12.32          | 27.88 | 15.07          |  | 10  | 33.24 | 15.21          | 18.15         | 10.94          | 20.18 | 10.81          | 29.37 | 14.49          |  |  |  |  |  |  |  |  |

  

| CHROMOSOME 15 |     |       |                |       |                |       |                |       |                |  |     |       |                | CHROMOSOME 16 |                |       |                |       |                |  |  |  |  |  |  |  |  |
|---------------|-----|-------|----------------|-------|----------------|-------|----------------|-------|----------------|--|-----|-------|----------------|---------------|----------------|-------|----------------|-------|----------------|--|--|--|--|--|--|--|--|
|               | $n$ | A [%] | $\sigma_C$ [A] | C [%] | $\sigma_C$ [C] | G [%] | $\sigma_C$ [G] | T [%] | $\sigma_C$ [T] |  | $n$ | A [%] | $\sigma_C$ [A] | C [%]         | $\sigma_C$ [C] | G [%] | $\sigma_C$ [G] | T [%] | $\sigma_C$ [T] |  |  |  |  |  |  |  |  |
|               | 2   | 40.84 | 14.37          | 22.25 | 13.19          | 23.12 | 13.67          | 40.13 | 14.71          |  | 2   | 34.88 | 13.87          | 26.22         | 14.91          | 23.30 | 13.63          | 37.54 | 14.59          |  |  |  |  |  |  |  |  |
| $k = 1$       | 4   | 32.64 | 16.55          | 21.69 | 14.08          | 20.74 | 12.54          | 33.00 | 16.61          |  | 4   | 29.17 | 16.31          | 24.30         | 15.60          | 22.89 | 15.77          | 31.49 | 15.69          |  |  |  |  |  |  |  |  |
|               | 6   | 28.66 | 17.57          | 21.93 | 13.45          | 20.68 | 12.84          | 30.43 | 16.80          |  | 6   | 26.91 | 17.84          | 24.44         | 15.90          | 21.56 | 15.33          | 29.44 | 16.86          |  |  |  |  |  |  |  |  |
|               | 8   | 27.51 | 16.52          | 22.48 | 13.72          | 20.39 | 12.91          | 30.04 | 16.31          |  | 8   | 26.43 | 16.97          | 23.79         | 15.97          | 22.74 | 15.51          | 27.78 | 16.10          |  |  |  |  |  |  |  |  |
|               | 10  | 28.58 | 15.42          | 22.23 | 12.96          | 20.69 | 11.69          | 29.10 | 14.67          |  | 10  | 26.67 | 15.58          | 23.77         | 15.40          | 23.00 | 14.99          | 26.56 | 14.94          |  |  |  |  |  |  |  |  |
|               | 2   | 40.26 | 14.52          | 22.73 | 16.03          | 23.13 | 14.63          | 36.79 | 11.11          |  | 2   | 38.33 | 14.90          | 24.35         | 13.47          | 23.99 | 12.90          | 38.60 | 15.42          |  |  |  |  |  |  |  |  |
| $k = 2$       | 4   | 32.34 | 18.19          | 22.98 | 16.33          | 21.29 | 14.48          | 31.79 | 16.12          |  | 4   | 31.94 | 17.61          | 22.15         | 13.18          | 22.26 | 13.36          | 33.44 | 18.60          |  |  |  |  |  |  |  |  |
|               | 6   | 31.23 | 17.22          | 21.30 | 14.22          | 22.31 | 13.14          | 28.10 | 16.50          |  | 6   | 29.28 | 18.50          | 22.01         | 14.21          | 22.22 | 14.79          | 30.41 | 19.57          |  |  |  |  |  |  |  |  |
|               | 8   | 30.73 | 15.97          | 21.10 | 13.49          | 21.56 | 12.23          | 27.67 | 14.99          |  | 8   | 27.47 | 17.88          | 22.30         | 13.95          | 21.70 | 15.03          | 29.83 | 18.42          |  |  |  |  |  |  |  |  |
|               | 10  | 30.12 | 14.71          | 20.70 | 11.97          | 21.94 | 11.71          | 27.72 | 14.31          |  | 10  | 26.21 | 17.27          | 22.85         | 14.23          | 21.21 | 14.77          | 30.13 | 17.77          |  |  |  |  |  |  |  |  |
|               | 2   | 37.32 | 10.29          | 23.57 | 14.73          | 21.14 | 13.91          | 42.04 | 15.39          |  | 2   | 33.14 | 12.52          | 22.66         | 10.96          | 21.99 | 12.25          | 34.38 | 15.95          |  |  |  |  |  |  |  |  |
| $k = 3$       | 4   | 30.90 | 18.55          | 23.68 | 15.16          | 19.56 | 13.97          | 35.87 | 18.51          |  | 4   | 28.95 | 13.80          | 22.68         | 11.12          | 21.02 | 11.42          | 31.08 | 15.86          |  |  |  |  |  |  |  |  |
|               | 6   | 26.78 | 15.31          | 22.30 | 12.87          | 19.83 | 14.77          | 34.00 | 17.49          |  | 6   | 26.82 | 13.90          | 23.25         | 12.02          | 20.76 | 11.06          | 30.52 | 14.57          |  |  |  |  |  |  |  |  |
|               | 8   | 27.56 | 14.08          | 21.79 | 11.45          | 19.29 | 11.82          | 32.83 | 15.67          |  | 8   | 26.30 | 13.54          | 23.29         | 11.90          | 20.48 | 11.38          | 30.87 | 14.32          |  |  |  |  |  |  |  |  |
|               | 10  | 27.57 | 13.71          | 21.65 | 11.93          | 20.55 | 13.03          | 31.30 | 15.35          |  | 10  | 27.63 | 12.70          | 21.72         | 10.19          | 21.03 | 10.32          | 30.07 | 13.09          |  |  |  |  |  |  |  |  |

Table 4: Same as Table 1 but for the chromosomes 13, 14, 15, 16.

| CHROMOSOME 17 |       |                |       |                |       |                |       |                |     |       |                |       |                | CHROMOSOME 18 |                |       |                |  |  |  |  |  |  |  |  |  |  |
|---------------|-------|----------------|-------|----------------|-------|----------------|-------|----------------|-----|-------|----------------|-------|----------------|---------------|----------------|-------|----------------|--|--|--|--|--|--|--|--|--|--|
| $n$           | A [%] | $\sigma_C$ [A] | C [%] | $\sigma_C$ [C] | G [%] | $\sigma_C$ [G] | T [%] | $\sigma_C$ [T] | $n$ | A [%] | $\sigma_C$ [A] | C [%] | $\sigma_C$ [C] | G [%]         | $\sigma_C$ [G] | T [%] | $\sigma_C$ [T] |  |  |  |  |  |  |  |  |  |  |
| 2             | 25.71 | 5.54           | 24.38 | 5.28           | 24.65 | 4.95           | 24.90 | 5.20           | 2   | 42.55 | 14.55          | 22.81 | 13.48          | 25.01         | 14.13          | 40.47 | 13.18          |  |  |  |  |  |  |  |  |  |  |
| 4             | 25.36 | 5.06           | 24.80 | 5.17           | 24.73 | 4.95           | 24.87 | 5.67           | 4   | 36.73 | 20.02          | 21.26 | 13.98          | 21.86         | 14.10          | 31.97 | 18.47          |  |  |  |  |  |  |  |  |  |  |
| 6             | 26.11 | 5.08           | 24.49 | 4.16           | 24.23 | 4.08           | 24.95 | 4.30           | 6   | 33.41 | 18.97          | 20.95 | 13.48          | 21.45         | 13.36          | 28.45 | 17.62          |  |  |  |  |  |  |  |  |  |  |
| 8             | 25.49 | 4.55           | 24.52 | 4.19           | 24.35 | 4.18           | 25.43 | 4.50           | 8   | 32.92 | 16.95          | 20.01 | 10.97          | 21.56         | 11.11          | 27.60 | 16.08          |  |  |  |  |  |  |  |  |  |  |
| 10            | 25.35 | 4.09           | 24.91 | 4.04           | 24.65 | 4.14           | 24.90 | 3.96           | 10  | 32.53 | 15.32          | 19.32 | 10.33          | 21.74         | 10.80          | 27.25 | 15.02          |  |  |  |  |  |  |  |  |  |  |
| 2             | 27.62 | 5.13           | 21.78 | 5.09           | 22.77 | 5.48           | 27.83 | 5.36           | 2   | 31.93 | 11.44          | 22.82 | 10.61          | 21.59         | 10.29          | 31.88 | 12.57          |  |  |  |  |  |  |  |  |  |  |
| 4             | 27.63 | 4.99           | 22.07 | 5.00           | 22.28 | 4.50           | 28.02 | 4.99           | 4   | 29.46 | 11.69          | 21.76 | 9.87           | 21.95         | 9.81           | 29.95 | 12.44          |  |  |  |  |  |  |  |  |  |  |
| 6             | 27.95 | 5.91           | 22.24 | 5.39           | 21.96 | 5.11           | 27.84 | 4.96           | 6   | 28.09 | 11.62          | 21.76 | 9.12           | 21.62         | 8.95           | 29.66 | 12.16          |  |  |  |  |  |  |  |  |  |  |
| 8             | 27.62 | 4.73           | 22.16 | 4.45           | 22.20 | 4.36           | 28.02 | 4.94           | 8   | 28.07 | 11.33          | 21.32 | 9.83           | 21.95         | 10.62          | 29.45 | 12.58          |  |  |  |  |  |  |  |  |  |  |
| 10            | 27.57 | 4.64           | 22.17 | 4.19           | 22.27 | 4.01           | 27.99 | 4.34           | 10  | 27.79 | 11.30          | 21.26 | 9.22           | 21.42         | 9.55           | 29.65 | 12.03          |  |  |  |  |  |  |  |  |  |  |
| 2             | 28.52 | 6.19           | 22.41 | 4.87           | 21.39 | 4.51           | 27.67 | 5.12           | 2   | 31.20 | 7.92           | 19.97 | 6.75           | 19.63         | 5.92           | 29.20 | 7.57           |  |  |  |  |  |  |  |  |  |  |
| 4             | 28.19 | 5.44           | 22.51 | 4.84           | 21.68 | 4.80           | 27.62 | 4.97           | 4   | 31.45 | 8.15           | 20.03 | 5.94           | 19.84         | 5.90           | 29.06 | 7.43           |  |  |  |  |  |  |  |  |  |  |
| 6             | 27.83 | 5.20           | 22.68 | 4.89           | 21.71 | 4.45           | 27.78 | 4.89           | 6   | 30.93 | 6.62           | 19.89 | 5.88           | 20.03         | 5.79           | 29.30 | 7.17           |  |  |  |  |  |  |  |  |  |  |
| 8             | 27.86 | 5.13           | 22.46 | 4.63           | 21.74 | 4.43           | 27.94 | 4.70           | 8   | 31.34 | 6.30           | 19.54 | 5.79           | 19.90         | 5.49           | 29.36 | 6.48           |  |  |  |  |  |  |  |  |  |  |
| 10            | 27.61 | 4.83           | 22.71 | 4.22           | 21.89 | 4.03           | 27.80 | 4.42           | 10  | 31.25 | 5.79           | 19.48 | 5.72           | 19.64         | 5.51           | 29.63 | 6.21           |  |  |  |  |  |  |  |  |  |  |

  

| CHROMOSOME 19 |       |                |       |                |       |                |       |                |     |       |                |       |                | CHROMOSOME 20 |                |       |                |  |  |  |  |  |  |  |  |  |  |
|---------------|-------|----------------|-------|----------------|-------|----------------|-------|----------------|-----|-------|----------------|-------|----------------|---------------|----------------|-------|----------------|--|--|--|--|--|--|--|--|--|--|
| $n$           | A [%] | $\sigma_C$ [A] | C [%] | $\sigma_C$ [C] | G [%] | $\sigma_C$ [G] | T [%] | $\sigma_C$ [T] | $n$ | A [%] | $\sigma_C$ [A] | C [%] | $\sigma_C$ [C] | G [%]         | $\sigma_C$ [G] | T [%] | $\sigma_C$ [T] |  |  |  |  |  |  |  |  |  |  |
| 2             | 38.68 | 16.90          | 25.41 | 13.50          | 23.06 | 11.51          | 38.36 | 14.56          | 2   | 35.49 | 13.10          | 24.93 | 12.17          | 21.37         | 12.11          | 41.67 | 15.11          |  |  |  |  |  |  |  |  |  |  |
| 4             | 32.65 | 17.90          | 21.61 | 14.88          | 23.15 | 13.99          | 30.64 | 17.10          | 4   | 29.01 | 17.31          | 24.09 | 13.86          | 19.02         | 14.33          | 36.45 | 18.70          |  |  |  |  |  |  |  |  |  |  |
| 6             | 30.43 | 18.05          | 20.61 | 15.50          | 24.70 | 15.61          | 26.28 | 17.62          | 6   | 27.49 | 16.91          | 23.23 | 13.43          | 19.70         | 14.02          | 32.51 | 18.17          |  |  |  |  |  |  |  |  |  |  |
| 8             | 29.95 | 18.15          | 20.73 | 15.20          | 24.61 | 15.06          | 25.99 | 17.05          | 8   | 25.65 | 16.25          | 24.03 | 13.52          | 19.20         | 14.16          | 32.86 | 17.67          |  |  |  |  |  |  |  |  |  |  |
| 10            | 29.30 | 16.57          | 21.25 | 14.76          | 24.64 | 15.24          | 25.51 | 16.54          | 10  | 26.47 | 15.40          | 22.98 | 12.55          | 20.00         | 13.28          | 31.47 | 16.89          |  |  |  |  |  |  |  |  |  |  |
| 2             | 38.61 | 14.65          | 20.05 | 11.18          | 25.03 | 13.78          | 36.39 | 14.68          | 2   | 37.88 | 14.25          | 23.84 | 13.07          | 22.79         | 11.18          | 38.59 | 14.92          |  |  |  |  |  |  |  |  |  |  |
| 4             | 34.50 | 16.28          | 19.97 | 12.87          | 25.59 | 14.52          | 28.19 | 17.72          | 4   | 31.75 | 18.28          | 22.38 | 14.30          | 20.80         | 12.67          | 33.24 | 18.42          |  |  |  |  |  |  |  |  |  |  |
| 6             | 30.68 | 16.89          | 21.23 | 13.41          | 25.19 | 15.09          | 26.28 | 17.61          | 6   | 29.21 | 17.20          | 21.65 | 14.26          | 21.59         | 14.24          | 31.39 | 18.24          |  |  |  |  |  |  |  |  |  |  |
| 8             | 29.23 | 15.55          | 21.85 | 12.49          | 24.95 | 13.11          | 25.28 | 15.67          | 8   | 27.95 | 13.06          | 22.28 | 11.21          | 23.55         | 11.85          | 26.91 | 13.73          |  |  |  |  |  |  |  |  |  |  |
| 10            | 27.52 | 15.23          | 23.16 | 12.88          | 25.04 | 12.76          | 24.72 | 14.68          | 10  | 28.68 | 15.74          | 21.82 | 13.93          | 20.67         | 13.14          | 29.55 | 15.70          |  |  |  |  |  |  |  |  |  |  |
| 2             | 35.86 | 13.33          | 25.37 | 13.36          | 23.27 | 13.08          | 38.80 | 15.55          | 2   | 33.43 | 12.67          | 22.50 | 10.70          | 23.62         | 9.91           | 32.60 | 15.17          |  |  |  |  |  |  |  |  |  |  |
| 4             | 29.55 | 16.31          | 24.42 | 14.64          | 22.30 | 14.52          | 31.97 | 17.94          | 4   | 31.75 | 18.28          | 22.38 | 14.30          | 20.80         | 12.67          | 33.24 | 18.42          |  |  |  |  |  |  |  |  |  |  |
| 6             | 26.12 | 17.33          | 25.32 | 15.54          | 22.15 | 15.52          | 29.65 | 17.41          | 6   | 28.45 | 14.39          | 21.95 | 11.96          | 22.89         | 12.12          | 28.57 | 14.46          |  |  |  |  |  |  |  |  |  |  |
| 8             | 25.09 | 16.78          | 25.20 | 15.10          | 22.89 | 14.72          | 28.67 | 17.03          | 8   | 27.95 | 13.06          | 22.28 | 11.21          | 23.55         | 11.85          | 26.91 | 13.73          |  |  |  |  |  |  |  |  |  |  |
| 10            | 24.33 | 14.52          | 25.66 | 14.61          | 24.01 | 14.61          | 26.30 | 14.77          | 10  | 27.78 | 12.94          | 22.06 | 11.55          | 23.88         | 11.58          | 26.63 | 13.24          |  |  |  |  |  |  |  |  |  |  |

Table 5: Same as Table 1 but for the chromosomes 17, 18, 19, 20.

| CHROMOSOME 21 |       |                |       |                |       |                |       |                |     |       |                |       | CHROMOSOME 22  |       |                |       |                |  |  |  |  |  |  |  |  |
|---------------|-------|----------------|-------|----------------|-------|----------------|-------|----------------|-----|-------|----------------|-------|----------------|-------|----------------|-------|----------------|--|--|--|--|--|--|--|--|
| $n$           | A [%] | $\sigma_C$ [A] | C [%] | $\sigma_C$ [C] | G [%] | $\sigma_C$ [G] | T [%] | $\sigma_C$ [T] | $n$ | A [%] | $\sigma_C$ [A] | C [%] | $\sigma_C$ [C] | G [%] | $\sigma_C$ [G] | T [%] | $\sigma_C$ [T] |  |  |  |  |  |  |  |  |
| 2             | 32.52 | 9.24           | 19.66 | 7.38           | 21.05 | 7.01           | 28.31 | 9.95           | 2   | 28.21 | 8.29           | 23.37 | 5.53           | 24.47 | 5.44           | 25.65 | 9.69           |  |  |  |  |  |  |  |  |
| 4             | 32.27 | 10.84          | 19.25 | 7.69           | 21.18 | 8.50           | 27.29 | 10.81          | 4   | 28.30 | 8.40           | 22.93 | 5.81           | 24.63 | 5.53           | 24.92 | 8.48           |  |  |  |  |  |  |  |  |
| 6             | 32.20 | 10.90          | 18.38 | 8.19           | 20.98 | 8.07           | 28.45 | 10.73          | 6   | 27.59 | 8.41           | 23.98 | 6.54           | 24.10 | 5.87           | 24.81 | 7.87           |  |  |  |  |  |  |  |  |
| 8             | 32.41 | 10.32          | 17.72 | 7.97           | 21.53 | 8.50           | 28.44 | 10.97          | 8   | 26.79 | 7.54           | 24.46 | 7.00           | 23.85 | 6.70           | 25.19 | 7.22           |  |  |  |  |  |  |  |  |
| 10            | 33.28 | 9.08           | 16.28 | 7.82           | 23.14 | 9.14           | 27.29 | 9.70           | 10  | 26.91 | 7.33           | 24.28 | 7.10           | 23.32 | 7.10           | 25.91 | 7.13           |  |  |  |  |  |  |  |  |
| 2             | 31.33 | 12.48          | 20.18 | 8.33           | 21.33 | 8.27           | 27.94 | 12.05          | 2   | 28.72 | 7.15           | 23.14 | 6.23           | 22.19 | 6.52           | 26.81 | 6.35           |  |  |  |  |  |  |  |  |
| 4             | 30.79 | 12.03          | 20.27 | 8.92           | 21.61 | 8.30           | 27.61 | 12.33          | 4   | 28.05 | 6.28           | 22.47 | 5.96           | 22.82 | 6.22           | 26.80 | 7.09           |  |  |  |  |  |  |  |  |
| 6             | 31.16 | 11.19          | 19.70 | 7.91           | 20.83 | 7.86           | 28.42 | 11.55          | 6   | 28.21 | 6.46           | 22.49 | 7.13           | 23.53 | 7.29           | 26.03 | 7.54           |  |  |  |  |  |  |  |  |
| 8             | 31.73 | 10.24          | 19.58 | 7.46           | 20.48 | 7.80           | 28.21 | 11.21          | 8   | 28.16 | 6.65           | 22.20 | 7.20           | 23.21 | 7.10           | 26.44 | 7.23           |  |  |  |  |  |  |  |  |
| 10            | 31.96 | 9.91           | 19.43 | 7.70           | 20.50 | 7.75           | 28.27 | 10.63          | 10  | 27.97 | 5.58           | 22.28 | 5.32           | 23.39 | 6.14           | 26.35 | 6.65           |  |  |  |  |  |  |  |  |
| 2             | 28.33 | 10.45          | 22.50 | 9.69           | 24.70 | 8.74           | 25.18 | 9.31           | 2   | 25.05 | 6.75           | 25.32 | 7.10           | 23.36 | 6.74           | 25.83 | 8.30           |  |  |  |  |  |  |  |  |
| 4             | 28.38 | 10.78          | 22.33 | 9.23           | 24.33 | 9.51           | 25.69 | 9.84           | 4   | 25.56 | 6.21           | 25.26 | 6.48           | 23.93 | 6.33           | 25.74 | 7.70           |  |  |  |  |  |  |  |  |
| 6             | 27.95 | 9.06           | 21.98 | 8.10           | 24.01 | 8.76           | 26.06 | 9.32           | 6   | 25.55 | 6.23           | 25.26 | 6.02           | 24.39 | 6.13           | 24.94 | 6.98           |  |  |  |  |  |  |  |  |
| 8             | 28.36 | 8.95           | 21.66 | 7.86           | 24.10 | 8.33           | 25.87 | 8.83           | 8   | 24.90 | 5.56           | 25.50 | 5.78           | 24.92 | 6.67           | 24.67 | 6.40           |  |  |  |  |  |  |  |  |
| 10            | 27.94 | 8.86           | 21.64 | 7.85           | 24.30 | 9.44           | 26.31 | 8.78           | 10  | 24.71 | 5.89           | 25.73 | 6.63           | 25.08 | 6.38           | 24.49 | 6.03           |  |  |  |  |  |  |  |  |

  

| CHROMOSOME X |       |                |       |                |       |                |       |                |     |       |                |       | CHROMOSOME Y   |       |                |       |                |  |  |  |  |  |  |  |  |
|--------------|-------|----------------|-------|----------------|-------|----------------|-------|----------------|-----|-------|----------------|-------|----------------|-------|----------------|-------|----------------|--|--|--|--|--|--|--|--|
| $n$          | A [%] | $\sigma_C$ [A] | C [%] | $\sigma_C$ [C] | G [%] | $\sigma_C$ [G] | T [%] | $\sigma_C$ [T] | $n$ | A [%] | $\sigma_C$ [A] | C [%] | $\sigma_C$ [C] | G [%] | $\sigma_C$ [G] | T [%] | $\sigma_C$ [T] |  |  |  |  |  |  |  |  |
| 2            | 38.67 | 14.73          | 25.21 | 11.59          | 26.64 | 13.51          | 37.66 | 15.49          | 2   | 27.56 | 5.91           | 21.89 | 5.63           | 23.92 | 6.35           | 27.13 | 7.52           |  |  |  |  |  |  |  |  |
| 4            | 32.88 | 18.06          | 20.86 | 14.09          | 25.39 | 14.87          | 28.01 | 19.06          | 4   | 27.45 | 6.19           | 22.05 | 6.66           | 24.21 | 7.08           | 26.49 | 7.47           |  |  |  |  |  |  |  |  |
| 6            | 31.16 | 17.92          | 20.53 | 14.69          | 24.35 | 15.84          | 27.09 | 18.84          | 6   | 27.99 | 6.64           | 21.59 | 6.55           | 24.40 | 7.23           | 26.02 | 7.50           |  |  |  |  |  |  |  |  |
| 8            | 30.65 | 18.29          | 20.27 | 15.59          | 24.21 | 15.68          | 26.05 | 18.37          | 8   | 28.12 | 7.02           | 21.55 | 7.17           | 24.14 | 7.85           | 26.19 | 8.48           |  |  |  |  |  |  |  |  |
| 10           | 30.12 | 17.79          | 20.48 | 14.47          | 22.97 | 15.27          | 27.38 | 18.34          | 10  | 27.89 | 6.99           | 21.88 | 6.60           | 23.30 | 7.52           | 26.90 | 8.10           |  |  |  |  |  |  |  |  |
| 2            | 41.63 | 15.41          | 20.02 | 10.78          | 25.17 | 14.33          | 38.13 | 13.19          | 2   | 31.50 | 5.49           | 19.11 | 3.89           | 19.90 | 5.15           | 29.49 | 5.97           |  |  |  |  |  |  |  |  |
| 4            | 36.55 | 19.80          | 19.34 | 14.29          | 23.76 | 14.87          | 30.55 | 18.56          | 4   | 31.25 | 5.32           | 19.39 | 4.36           | 19.72 | 4.72           | 29.64 | 5.89           |  |  |  |  |  |  |  |  |
| 6            | 34.19 | 17.37          | 18.30 | 13.05          | 24.36 | 14.39          | 26.35 | 17.62          | 6   | 31.00 | 5.51           | 19.38 | 4.23           | 20.45 | 4.93           | 29.17 | 5.71           |  |  |  |  |  |  |  |  |
| 8            | 32.40 | 17.61          | 18.84 | 12.59          | 23.18 | 13.59          | 26.49 | 17.30          | 8   | 30.82 | 5.48           | 19.57 | 4.31           | 20.34 | 4.65           | 29.28 | 5.38           |  |  |  |  |  |  |  |  |
| 10           | 31.63 | 15.34          | 18.49 | 11.41          | 23.45 | 13.08          | 26.43 | 15.56          | 10  | 30.83 | 5.16           | 19.28 | 4.26           | 20.68 | 4.24           | 29.20 | 4.85           |  |  |  |  |  |  |  |  |
| 2            | 40.67 | 14.60          | 23.74 | 14.84          | 22.29 | 13.32          | 39.75 | 13.89          | 2   | 31.33 | 5.54           | 19.29 | 4.94           | 20.09 | 4.91           | 29.29 | 6.08           |  |  |  |  |  |  |  |  |
| 4            | 33.73 | 17.43          | 21.57 | 12.97          | 21.01 | 13.04          | 32.29 | 15.92          | 4   | 31.61 | 6.17           | 18.90 | 4.98           | 20.53 | 5.72           | 28.96 | 6.95           |  |  |  |  |  |  |  |  |
| 6            | 29.39 | 17.92          | 22.04 | 13.80          | 19.14 | 12.31          | 31.79 | 16.95          | 6   | 30.91 | 5.64           | 19.35 | 4.42           | 20.25 | 4.41           | 29.49 | 5.88           |  |  |  |  |  |  |  |  |
| 8            | 29.00 | 17.57          | 21.27 | 12.02          | 19.26 | 11.20          | 32.49 | 15.59          | 8   | 30.76 | 5.34           | 19.29 | 3.98           | 20.34 | 4.47           | 29.60 | 6.02           |  |  |  |  |  |  |  |  |
| 10           | 28.61 | 16.07          | 20.97 | 11.35          | 19.76 | 10.58          | 31.25 | 15.08          | 10  | 30.61 | 5.37           | 19.19 | 4.15           | 20.46 | 4.59           | 29.73 | 5.77           |  |  |  |  |  |  |  |  |

Table 6: Same as Table 1 but for the chromosomes 21, 22, 23, 24.
